# Supplementary material
Source: PubMed Central journal article supplement (PMC2902817)
Supplement: djn178_2.pdf [file djn178_2.pdf]

**Supplementary Table 1. Histopathology of select tissues from virally-immunized C57BL/6 and BALB/c mice**

| Organ     | Immunizations |               |            |                       |                        |            |
|-----------|---------------|---------------|------------|-----------------------|------------------------|------------|
|           | Control       |               |            | GCC <sub>ECD</sub>    |                        |            |
|           | Control AV    | Control ARV*  | BALB/c TB† | GCC <sub>ECD</sub> AV | GCC <sub>ECD</sub> ARV | BALB/c TB† |
|           | C57BL/6 (n=3) | C57BL/6 (n=2) | (n=3)      | C57BL/6 (n=3)         | C57BL/6 (n=2)          | (n=3)      |
| Liver     | ND‡           | ND‡           | Normal     | ND‡                   | ND‡                    | Normal     |
| Lung      | Normal        | ND‡           | Normal     | Normal                | ND‡                    | Normal     |
| Kidney    | Normal        | ND‡           | Normal     | Normal                | ND‡                    | Normal     |
| Esophagus | Normal        | ND‡           | Normal     | Normal                | ND‡                    | Normal     |
| Stomach   | Normal        | ND‡           | Normal     | Normal                | ND‡                    | Normal     |
| Duodenum  | Normal        | Normal        | Normal     | Normal                | Normal                 | Normal     |
| Jejunum   | Normal        | Normal        | Normal     | Normal                | Normal                 | Normal     |
| Ileum     | Normal        | Normal        | Normal     | Normal                | Normal                 | Normal     |
| Colon     | Normal        | Normal        | Normal     | Normal                | Normal                 | Normal     |

\*ARV = Adeno-, rabies, vaccinia virus  
†TB = tumor-bearing mice from Figure 1c-e  
‡ND = not determined
